# Supplementary material for: High-Pressure Processing of Fruit Smoothies Enriched with Dietary Fiber from Carrot Discards: Effects on the Contents and Bioaccessibilities of Carotenoids and Vitamin E
Source: MDPI journal article supplement (doi:10.3390/molecules29061259), 2024-03-12
Supplement: s1 [file s1]

## Supplementary Material

### High-Pressure Processing of fruit smoothies enriched with dietary fiber from carrot discards: effects on the contents and bio-accessibilities of carotenoids and vitamin E.

**Authors:** Melisa Donda Zbinden <sup>1,2</sup>, Mario Schmidt <sup>3</sup>, Charito Ivana Vignatti <sup>1,2</sup>, Maria Élide Pirovani <sup>1</sup> and Volker Böhm <sup>3, \*</sup>

#### Affiliations:

<sup>1</sup> Instituto de Tecnología de Alimentos, Universidad Nacional del Litoral, 3000 Santa Fe, Argentina

<sup>2</sup> Consejo Nacional de Investigaciones Científicas y Técnicas (CONICET), 3000 Santa Fe, Argentina

<sup>3</sup> Institute of Nutritional Sciences, Friedrich Schiller University Jena, 07743 Jena, Germany

#### Corresponding author:

\* Institute of Nutritional Sciences, Friedrich Schiller University Jena, Dornburger Straße 25-29, 07743 Jena, Germany. E-Mail address: volker.boehm@uni-jena.de, Tel.: +49 3641 949633; fax: +49 3641 949702.

**Table S1.** Bioaccessibility of carotenoids and  $\alpha$ -tocopherol (%) of untreated and high-pressure processed smoothies after 28 days during storage at 4 °C (mean  $\pm$  SD) (n=3).

| Bioaccessibility (%) |                |                    |                  |                   |                  |                        |                  |
|----------------------|----------------|--------------------|------------------|-------------------|------------------|------------------------|------------------|
| Treatment            | Storage (days) | Lutein             |                  | Zeaxanthin        |                  | $\beta$ -cryptoxanthin |                  |
|                      |                | BF                 | FF               | BF                | FF               | BF                     | FF               |
| Untreated            | 0              | 30.4 $\pm$ 7.0Aa   | 31.7 $\pm$ 2.8Ba | 19.3 $\pm$ 3.2Ab  | 22.5 $\pm$ 2.3Aa | 15.7 $\pm$ 3.0Aa       | 22.0 $\pm$ 4.2Aa |
| 450                  | 28             | 29.1 $\pm$ 1.8A    | 24.9 $\pm$ 2.0A  | 21.4 $\pm$ 1.0A   | 18.6 $\pm$ 3.9A  | 15.4 $\pm$ 0.8A        | 14.9 $\pm$ 1.6A  |
| 600                  | 28             | 32.6 $\pm$ 3.0a    | 32.4 $\pm$ 1.3a  | 11.5 $\pm$ 2.5a   | 20.1 $\pm$ 1.1a  | 25.1 $\pm$ 3.5b        | 18.4 $\pm$ 0.8a  |
| Table S1. Cont.      |                |                    |                  |                   |                  |                        |                  |
| Treatment            | Storage (days) | $\alpha$ -carotene |                  | $\beta$ -carotene |                  | $\alpha$ -tocopherol   |                  |
|                      |                | BF                 | FF               | BF                | FF               | BF                     | FF               |
| Untreated            | 0              | 50.2 $\pm$ 2.4Aa   | 77.6 $\pm$ 4.8Bb | 26.9 $\pm$ 6.6Aa  | 38.5 $\pm$ 2.3Bb | 21.3 $\pm$ 2.2Ba       | 23.3 $\pm$ 5.0Ba |
| 450                  | 28             | 47.4 $\pm$ 3.1A    | 37.8 $\pm$ 5.0A  | 28.9 $\pm$ 2.4A   | 24.9 $\pm$ 1.2A  | 12.5 $\pm$ 2.3A        | 13.7 $\pm$ 1.7A  |
| 600                  | 28             | 61.1 $\pm$ 9.7a    | 44.0 $\pm$ 8.1a  | 36.1 $\pm$ 8.9a   | 28.5 $\pm$ 3.7a  | 37.2 $\pm$ 2.8b        | 37.1 $\pm$ 6.3b  |

BF: Smoothie base formulation, FF: smoothie whit dietary fiber. Different capital letters in the same column indicate significant differences ( $p \leq 0.05$ ) between the untreated and treated sample at 450 MPa after 28 days of refrigerated storage. Different lowercase letters in the same column indicate significant differences ( $p \leq 0.05$ ) between the untreated and treated sample at 600 MPa after 28 days of refrigerated storage.
